# Supplementary material for: A microstructure-driven magnetic composite for excellent microwave absorption in extended Ku-band
Source: Royal Society of Chemistry journal article supplement (doi:10.1039/d1tc06038d), 2022-01-01
Supplement: d1tc06038d1.pdf [file d1tc06038d1.pdf]

**Microstructure driven magnetic composite for excellent microwave  
absorption in extended Ku-band**

Anurima De, Bhanu Bhusan Khatua\*

Materials Science Centre, Indian Institute of Technology Kharagpur, Kharagpur-721302, India

**\*Corresponding Author**

Prof. Bhanu Bhusan Khatua (Email: [khatuabb@matsc.iitkgp.ernet.in](mailto:khatuabb@matsc.iitkgp.ernet.in)).

Materials Science Centre, Indian Institute of Technology, Kharagpur –721302, India.

Tel.:+91-3222-283982

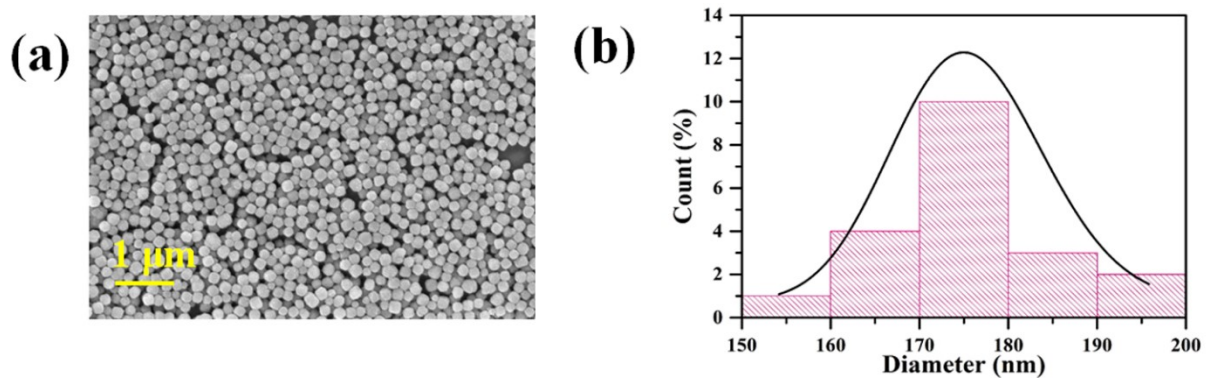

**Fig. S1** (a) FESEM image of particle size distribution of SPB nanoparticles, (b) Diameter distribution of SPB nanoparticles.

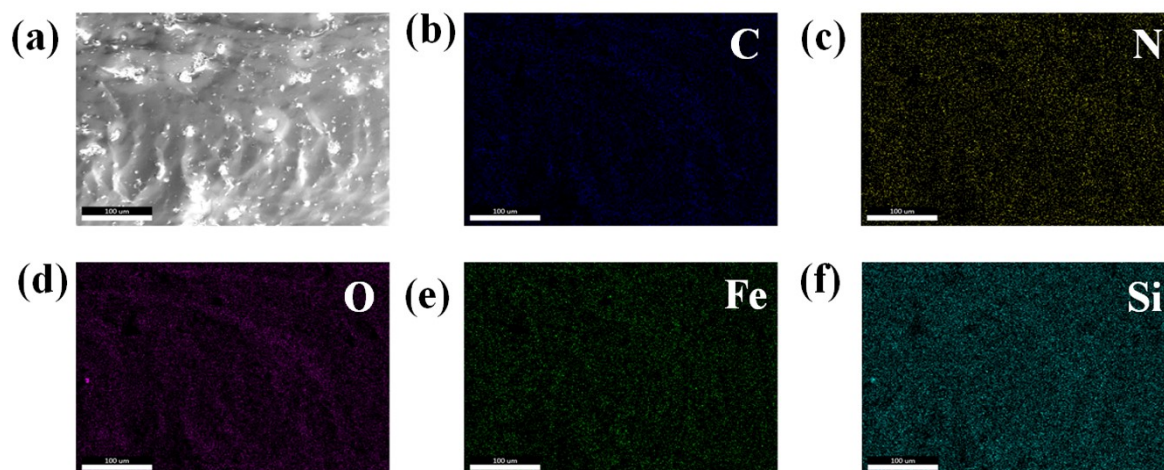

**Fig. S2** EDAX mapping of the elements in synthesized PHPBR1-1 polymer nanocomposite (a) selected area, (b) C, (c) N, (d) O, (e) Fe, and (f) Si.

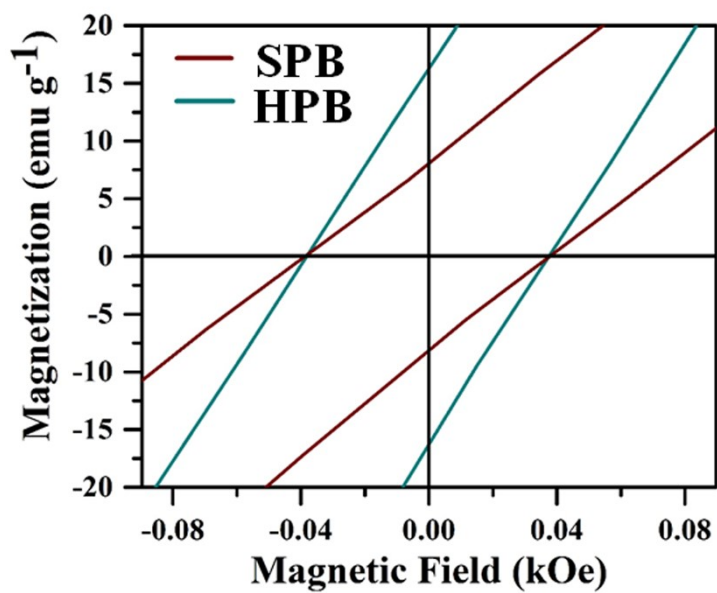

**Fig. S3** Field dependence magnetization expansion within +/- 80Oe of SPB and HPB nanoparticles.

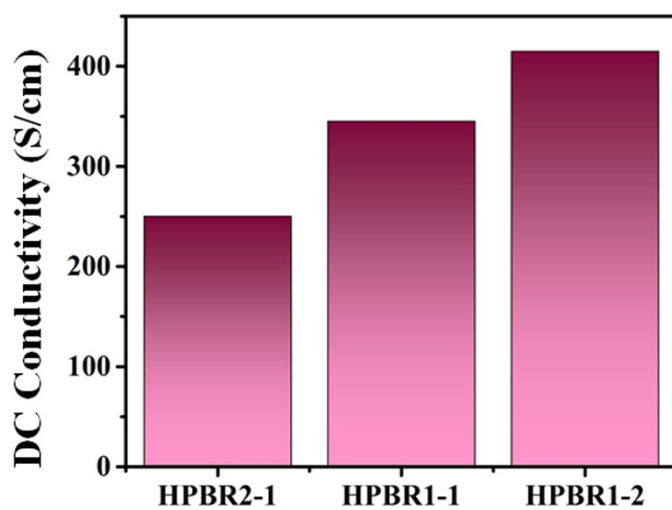

**Fig. S4** DC conductivity of (a) HPBR2-1, HPBR1-1, HPBR1-2 nanocomposites.

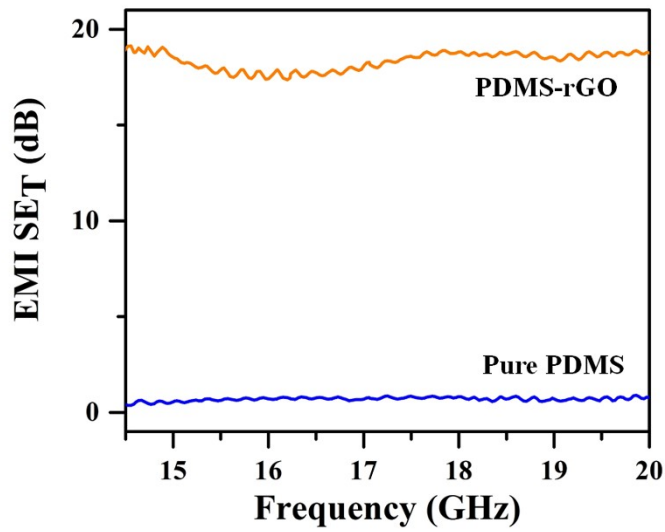

**Fig. S5** Frequency-dependent EMI SE<sub>T</sub> of pure PDMS polymer and 15 wt% rGO loaded PDMS based composite.

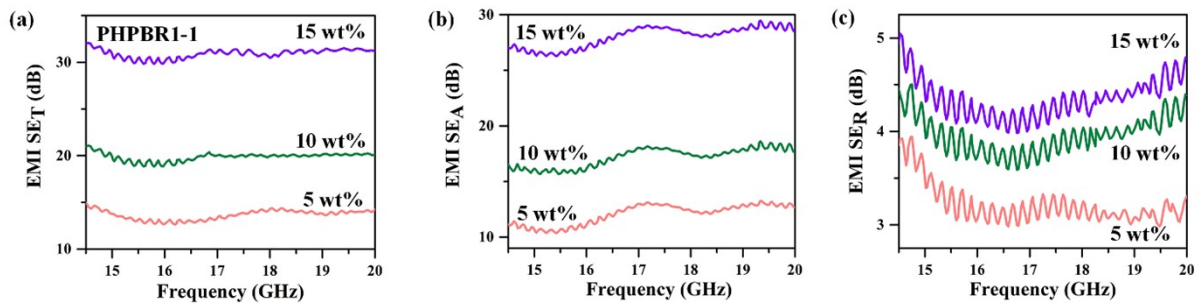

**Fig. S6** Frequency-dependent (a) EMI SE<sub>T</sub>, (b) EMI SE<sub>A</sub>, (c) EMI SE<sub>R</sub> of PHPBR1-1 polymer nanocomposite with different wt. % of filler (HPBR1-1) loading.

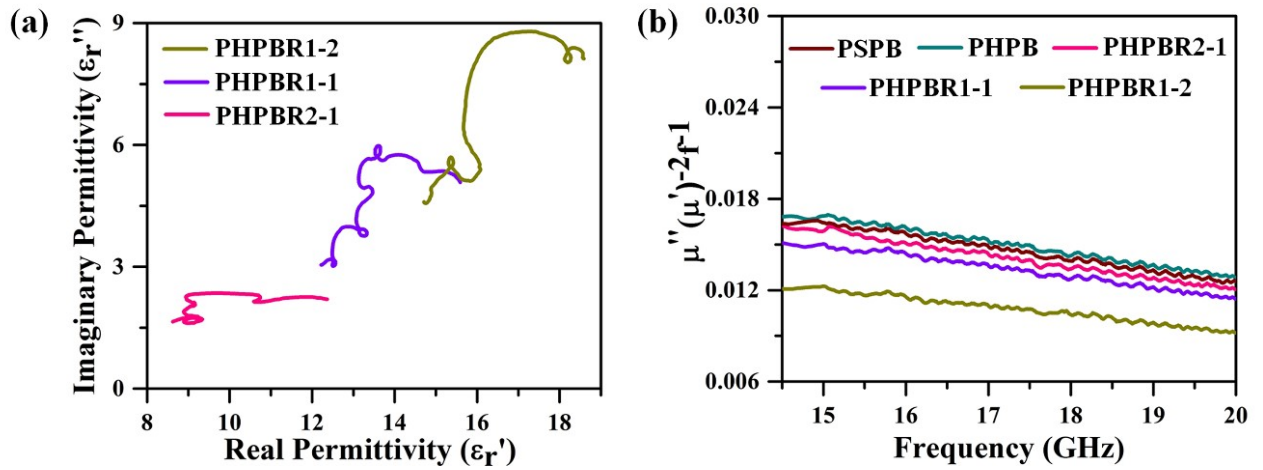

**Fig. S7** (a) Cole–Cole semicircles ( $\epsilon'$  versus  $\epsilon''$ ) of the prepared polymer nanocomposite (b)

$\mu''(\mu')^{-2}f^{-1}$  (representing eddy current loss) versus frequency of various prepared polymer nanocomposite with respect to frequency in the extended Ku-band region.
